# 1 Immune Profiling Panel: a proof of concept study of a new multiplex molecular 2 tool to assess the immune status of critically-ill patients

3 Dina M. Tawfik <sup>1,2</sup>, Laurence Vachot <sup>1,2</sup>, Adeline Bocquet <sup>2</sup>, Fabienne Venet <sup>3</sup>, Thomas Rimmelé <sup>1,4</sup>, Guillaume  
4 Monneret <sup>1,3</sup>, Sophie Blein <sup>2</sup>, Jesse L. Montgomery <sup>5</sup>, Andrew C. Hemmert <sup>5</sup>, Alexandre Pachot <sup>2</sup>, Virginie  
5 Moucadel <sup>1,2</sup>, Javier Yugueros Marcos <sup>2</sup>, Karen Brengel-Pesce <sup>1,2</sup>, François Mallet <sup>1,2</sup>, Julien Textoris <sup>1,2,4\*</sup>

6  
7 \*Corresponding author [Julien.textoris@biomerieux.com](mailto:Julien.textoris@biomerieux.com)

8 <sup>1</sup> EA7426 "Pathophysiology of Injury-Induced Immunosuppression", PI3, Université Claude Bernard Lyon-1 -  
9 Hospices Civils de Lyon - bioMérieux, Lyon, France

10 <sup>2</sup> Medical Diagnostic Discovery Department (MD3), bioMérieux S.A., France

11 <sup>3</sup> Immunology Laboratory, Hospices Civils de Lyon, Edouard Herriot Hospital, Lyon, France

12 <sup>4</sup> Anaesthesia and Critical Care Medicine Department, Hospices Civils de Lyon, Edouard Herriot Hospital, Lyon,  
13 France

14 <sup>5</sup> BioFire® Diagnostics LLC Salt Lake City, UT, USA

15

## 16 Abstract

17 **Background:** Critical illness such as sepsis is a life-threatening syndrome defined as a  
18 dysregulated host response to infection and is characterized by patients exhibiting various  
19 impaired immune profiles. In the field of diagnosis, a gap still remains in identifying the immune  
20 profile of critically-ill patients in the ICU. The availability of an immune profiling tool holds a  
21 great potential in providing patients at high risk with more accurate and precise management.  
22 In this study, a multiplex immune profiling panel prototype was assessed for its ability to semi-  
23 quantify immune markers directly from blood, using the FilmArray® System.

24           **Results:** The Immune Profiling Panel (IPP) prototype consists of 16 biomarkers that  
25 target both the innate and adaptive immune responses, pro- and anti-inflammatory mediators  
26 as well as genes involved in diverse regulatory pathways. The analytical studies carried out on  
27 healthy volunteers showed minimal inter- and intra-variability in testing the samples across the  
28 tested lots. The majority of the assays were linear with an  $R^2$  higher than 0.8. Results from the  
29 IPP pouch were comparable to qPCR and were within the limits of agreement. Finally,  
30 quantification cycle values of the target genes were normalized against reference genes to  
31 account for the different composition of cells among specimens. The use of the selected panel  
32 of markers in IPP demonstrated various gene modulations that could distinctly differentiate  
33 three profiles: healthy, borderline mHLA-DR septic shock patients and low mHLA-DR septic  
34 shock patients.

35           **Conclusion:** The Immune Profiling Panel allowed host transcriptomic analysis of immune  
36 response biomarkers directly from whole blood in less than an hour. The use of IPP showed  
37 great potential for the development of a fully automated, rapid and easy-to-use immune  
38 profiling tool, enabling the stratification of critically-ill patients at high risk in the ICU.

### 39 **Keywords**

40 Critically ill patients, Sepsis, Multiplex PCR, Biomarkers, *In Vitro* Diagnostic, FilmArray, Immune  
41 response, Syndromic panel

### 42 **Background**

43           Critically ill patients in the intensive care unit (ICU) exhibit a high risk of morbi-mortality  
44   and require special care and timely interventions. One of the major life-threatening situations  
45   in the ICU is sepsis, which is defined as an organ dysfunction caused by a dysregulated host  
46   response to infection (1). This dysregulated response includes an unbalanced pro- and anti-  
47   inflammatory immune response that translates into various immune profiles. These profiles  
48   manifest as a state of hyper-inflammation or features of profound immune suppression (2).

49           This current understanding of the underlying pathophysiology of sepsis has encouraged  
50   clinicians to use targeted therapy to restore the immune homeostasis and prevent unfavorable  
51   outcomes (3, 4). Nonetheless, personalized care is impeded by the absence of a comprehensive  
52   and fast diagnostic tool that would allow clinicians to precisely monitor the patient's immune  
53   profile. For more than 20 years, researchers have described several biomarkers in different  
54   platforms to characterize the immune dysfunctions of sepsis (5-8). Transcriptomic gene  
55   signatures were identified to stratify septic patients according to the severity and worsening of  
56   outcomes that could be used to guide therapy (9-11). Maslove *et al.* sought to validate three  
57   proposed scores that can distinguish septic from non-septic patients: Sepsis Metascore (SMS),  
58   Septicyte score and FAIM3:PLAC8 ratio in an independent dataset analysis (12). It was shown  
59   that the SMS score performed better than the others but further validations are still required.  
60   The team endorsed the use of gene expression profiling to stratify patients with sepsis in the  
61   presence of a rapid multiplex diagnostic tool (12). However, all the current immune profiling  
62   attempts are still in their infancy due to the complexity of the available platforms. Such  
63   sophisticated platforms require trained operating personnel, expert bioinformaticians to  
64   analyze the data, and experienced clinicians to interpret the results which is highly time-

65 consuming (13). All the previous obstacles hinder the implementation of such technologies as a  
66 routine practice in the ICU. However, the recent advances in multiplex-PCR technology could  
67 enable the deployment of multiple biomarkers for diagnosing and stratifying patients at the  
68 bedside (14, 15).

69 Multiplex molecular platforms such as the FilmArray® System (BioFire Diagnostics, LLC)  
70 have been developed and several commercial kits are available on the market, enabling the  
71 accurate detection of pathogens in less than an hour (16). FilmArray is an FDA and CE-IVD  
72 certified system, fully automated and user-friendly multiplex-nested qPCR (quantitative  
73 Polymerase Chain Reaction) technology that can measure up to 45 assays with a simplified  
74 report as a readout (17). We present here a proof of concept study for an Immune Profiling  
75 Panel (IPP), a transcriptomic molecular tool assessing the immune status directly from blood. In  
76 this work, we report the technical studies of the first IPP prototype used for the semi-  
77 quantification of mRNA from blood in the FilmArray System. Finally, the panel was tested on  
78 critically ill septic shock patients' specimens stratified according to the expression of HLA-DR  
79 (Human Leukocyte Antigen-DR) on monocytes. A decrease in the expression of HLA-DR on  
80 monocytes was often linked to poor outcomes and can be used as a marker to stratify  
81 immunocompromised septic patients (18).

## 82 **Methods**

### 83 **1. Immune profiling panel (IPP)**

84 Several lots of IPP pouch prototypes were manufactured in BioFire® Diagnostics (Salt Lake  
85 City, UT, USA) and transferred to our facility for technical assessment. The IPP pouches were

86 run as the commercial syndromic pouches according to manufacturer's instructions. Briefly, the  
87 supplied IPP pouches contain all the biochemical reagents and primers lyophilized ready to use  
88 upon hydration, which is done by injecting 1 mL of hydration solution provided with the kit. A  
89 100  $\mu$ L of whole blood samples were mixed with approximately 800  $\mu$ L of the lysis buffer  
90 provided with the panel and directly injected into the pouch, where a volume of 300  $\mu$ L of the  
91 mix is automatically drawn into the first well (19). Then the pouches were inserted into the  
92 FilmArray<sup>®</sup> 2.0 instrument (BioFire, Inc., Salt Lake City, UT, USA) and nucleic acids were  
93 automatically extracted from the sample, then the RNA is reversed transcribed and amplified  
94 (17). In some experiments, the extracted RNA samples were tested instead of PAXgene  
95 stabilized whole blood to aid in the assessment and study of the panel as some experiments  
96 require precise input of RNA. A controlled uniform RNA input helped us to correctly evaluate  
97 the semi-quantitative ability of the platform and assess the success of the signal normalization.  
98 Since IPP pouches are still a prototype, results are delivered in less than 1 hour in the form of  
99 real-time quantification cycle (Cq) values and post-amplification melt peaks. This is different  
100 from the commercial kits that provide an easy to read report generated by an internal  
101 interpretation algorithm, not yet available in the current IPP prototype.

102

## 103 **2. Healthy Volunteers and Patients samples**

104 **Healthy volunteer samples:** Whole blood from healthy volunteers collected in PAXgene  
105 tubes (Pre-Analytix, Hilden, Germany) was obtained from the EFS (Etablissement Français du

106 Sang, French blood bank, Grenoble). PAXgene tubes were inverted several times and incubated  
107 for 2 hours at room temperature according to the manufacturer's recommendation.

108 Total RNA was manually extracted from 30 healthy volunteers' PAXgene stabilized whole blood  
109 tubes using PAXgene blood RNA kit (Pre-Analytix, Hilden, Germany) according to manufacturer  
110 instructions. The extracted RNA's quantity and quality were determined using Nanodrop ND-  
111 1000 spectrophotometer (Nanodrop Technologies, Wilmington, DE) and Agilent 2100  
112 bioanalyzer (Agilent Technologies, Massy, France) to compute the RNA integrity number (RIN).  
113 For the linearity study, 10 extracted RNA with different inputs: 0.5, 1, 2, 10 and 100 ng were  
114 directly injected in the amplification chamber of the IPP pouch and samples were run on the  
115 FilmArray to study the linearity of the nested PCR assays in the IPP pouch. FilmArray's IPP  
116 performance was compared to qPCR using whole blood and RNA of 30 EFS volunteers. Finally,  
117 the extracted RNA of 10 healthy volunteers was tested against septic shock patients' samples at  
118 a quantity input of 10ng.

119 **Clinical samples from septic shock patients and cohort details:** RNA samples from  
120 patients were obtained from a previous prospective study Immunosepsis 1 (IS-1) including adult  
121 septic shock patients enrolled from December 2001 to April 2005 from two French university  
122 hospital ICUs (20). Twenty septic shock patients' RNA samples collected on day 3 were selected  
123 from the IS-1 cohort according to the expression of mHLA-DR measured by flow cytometry  
124 (**Table 1**). Ten septic shock patients were selected as a low mHLA-DR group when HLA-DR  
125 expression on monocytes was less than 30 %. The other 10 septic shock patients had an mHLA-

126 DR expression of more than 30% and were grouped as the borderline mHLA-DR expression  
 127 group.

128

129 **Table 1.** Clinical characteristics of septic shock patients from the Immunosepsis-1 cohort

| Parameter                                  | Bordeline mHLA-DR Patients (n=10) | Low mHLA-DR Patients (n=10) |
|--------------------------------------------|-----------------------------------|-----------------------------|
| <b>Characteristics of Patients</b>         |                                   |                             |
| Age (Years)                                | 68 [47-78]                        | 66 [36-88]                  |
| Gender, (Male)                             | 5 (50)                            | 5 (50)                      |
| Comorbidities* ( $\geq 1$ )                | 2 (20)                            | 5 (50)                      |
| SOFA (Day 1)                               | 8.5 [6-14]                        | 11 [7-15]                   |
| SOFA (Day 3)                               | 10 [5-13]                         | 12 [7-16]                   |
| SAPS II (Day 1)                            | 47 [35-67]                        | 60 [38-89]                  |
| HLA-DR (% expression on monocytes) Day 3-4 | 56 [35.8-100]                     | 15.3 [5.2-19.9]             |
| <b>Type of Admission</b>                   |                                   |                             |
|                                            | <b>N (%)</b>                      | <b>N (%)</b>                |
| Medical                                    | 7 (70)                            | 5 (50)                      |
| Elective Surgery                           | -                                 | 1 (10)                      |
| Surgical Emergency                         | 3 (30)                            | 4 (40)                      |
| <b>Primary Site of infection</b>           |                                   |                             |
|                                            | <b>N (%)</b>                      | <b>N (%)</b>                |
| Abdominal                                  | 4 (40)                            | 4 (40)                      |
| Pulmonary                                  | 4 (40)                            | 5 (50)                      |
| Other                                      | 2 (20)                            | 1 (10)                      |
| <b>Outcomes</b>                            |                                   |                             |
| ICU length of stay (Days)                  | 21 [6-82]                         | 22 [8-47]                   |
| Survivors at day 28                        | 7 (70)                            | 4 (40)                      |

130

131 Categorical variables are expressed as numbers (percentages), while continuous variables are expressed as median  
 132 [min-max range].

133 SOFA: Sequential Organ Failure Assessment score

134 SAPS II: Simplified Acute Physiology Score II

135 SAPS II and SOFA scores were measured after 24 hours of ICU stay (Day 1). SOFA score was measured again at Day  
 136 3.

137 \*Comorbidities include: Cardiac, hepatic, respiratory, or/and renal comorbidities

138

139

### 140 3. Reverse transcription and real-time PCR amplification

141 The qPCR was performed in a microplate, where RNA was reverse transcribed to  
142 complementary cDNA using SuperScript® VILO™ cDNA Synthesis Kit (Life Technologies, Chicago,  
143 Illinois, USA) and was ready to be amplified. Bench qPCR reactions were performed for S100A9  
144 on a LightCycler 480 instrument (Roche, Switzerland), using its corresponding probes master kit  
145 (Roche) following the manufacturer's instructions. Briefly, PCR reaction was carried out in  
146 triplicates in a final volume of 20 µL containing 0.5 µM of primers and 0.1 µM of probe, with an  
147 initial denaturation step of 10 mins at 95°C, followed by 45 cycles of a touchdown PCR protocol  
148 (10-sec at 95°C, 29-sec annealing at 68-58°C, and 1-sec extension at 72°C). The LightCycler  
149 software was used to automatically determine the Cq value for each individual sample and  
150 assay. Prototype Argene® kit (bioMerieux, France) was used for the amplification of CD74 and  
151 CX3CR1. The kits and RT-PCR amplifications were performed in ABI7500 thermocycler (Applied  
152 BioSystems®, USA). Briefly, triplicates of the samples were diluted 1:10 and mixed with 15µl of  
153 primer and probe mix, and 0.15µl of RT diluted 1:10 in water to a final volume of 25 µl. The PCR  
154 protocol included a 5 mins RT step at 50°C for one cycle, Taq polymerase activation step for 15  
155 mins at 95°C for another cycle. This was followed by PCR protocol of 45 cycles (10-sec  
156 denaturation at 95°C, 40-sec annealing at 60°C, and a 25-sec elongation step at 72°C). All  
157 samples should give a positive signal at 530 nm (FAM) otherwise the sample is considered  
158 negative. Raw Cq values of both methods were evaluated for equivalence using Bland-Altman  
159 analysis for each assay individually.

160



#### 161 **4. Statistical analysis & data management**

162 The linearity of markers was evaluated by the visual plotting of the linear regression models  
163 of Cq values against the log<sub>10</sub> transformation of the RNA quantities and reporting the R  
164 squared values ( $R^2$ ). Normalized expression values of the genes are expressed as median and  
165 interquartile ranges (IQR) box and whisker plots. Paired Wilcoxon signed rank test was used to  
166 assess significance before and after normalization of the Cq values in two RNA quantities. The  
167 differential expression of the IPP markers between the tested groups was compared using  
168 Mann-Whitney U test. The level of significance was set at 5% two-sided tests. Statistical  
169 analyses were performed and computed using R software v3.5.1.

170

### 171 **Results**

#### 172 **1. Immune profiling panel (IPP)**

173 Selection of the IPP markers was based on four pillars: 1) previous laboratory expertise in  
174 evaluating the performance and robustness of the markers in clinical trials (21-23) 2) good  
175 documentation of prognostic markers in literature (7, 24) 3) performance of the selected assays  
176 in duplex and multiplex in a classic qPCR setting 4) address a balanced representation of the  
177 pathways involved in diverse cells of both arms of the immunity. The pathways addressed by  
178 IPP include both innate and adaptive immune markers that were characterized in previous  
179 sepsis studies done in our laboratory. In addition, we aimed to target pro- and anti-  
180 inflammatory and immune suppression markers to provide as much information as possible on

181 the immune status and different profiles of patients (Fig.1). Finally, the first prototype of IPP  
182 pouches was manufactured which encompassed 16 target assays and 8 reference genes, for the  
183 signal normalization. The performance of the markers was then evaluated in several studies.

184

## 185 **2. Repeatability study**

186 We inspected the repeatability among 4 manufactured prototype lots by testing whole  
187 blood collected from a single healthy donor tested in triplicates. The variance was computed for  
188 all the samples and assays in each lot. A threshold of variance acceptance was set to +1 SD  
189 (Standard Deviation) of the overall variance. This threshold was selected as it was more  
190 stringent compared to the usually recommended +2 SD and could identify the markers with  
191 high variance. Fig. 2 illustrates that the overall variance for all markers was low across lots. Lot  
192 B had a higher variance which was mainly due to one gene (SDHA, a reference gene) that seems  
193 to be also variable in lot D. CD74 was identified as an outlier in one occurrence in only lot B  
194 while, PD-1 was an outlier in lots C and D. The observed high variances seem to be assay-  
195 related rather than lot-related. Indeed in the case of SDHA, the variance is probably linked to a  
196 problem in primer design that can be also be observed in the following studies, while PD-1  
197 variability might be due to the fact that it is barely expressed in healthy volunteers. The rest of  
198 the assays had minimal variability and remain below the limit of +1 SD, demonstrating the  
199 repeatability and robustness of the system.

200

201        **3.        Linear study of IPP assays in FilmArray:**

202        The FilmArray platform was initially developed for microbiology applications and detection  
203 of various pathogens from different sample types. Montgomery *et al.* initiated a study to use  
204 host response-based assays in FilmArray to discriminate viral from bacterial infection in patients  
205 (25). In our prototype pouch, we wanted to semi-quantify the host immune biomarkers in  
206 critically ill patients. To this end, we studied the linearity of the selected assays to ensure the  
207 possibility of semi-quantification using the FilmArray system. We used 5 known RNA quantities  
208 (0.5 - 100ng) to show that the IPP markers expression fall into the tested linear range of  
209 measurement. Fig.3 illustrates the linearity of three reference genes (DECR1, HPRT1, and PPIB)  
210 and three target genes (S100A9, CD74 and CX3CR1) representative of the panel. Reference and  
211 target gene assays were linear within the tested range of the total RNA quantities with  $R^2$   
212 values ranging from 0.51 to 0.94 (median 0.89). The majority of IPP assays exhibited high  $R^2$   
213 values above 0.8 (**Table 2**).  $R^2$  values below 0.8 were further inspected; such as IL6 and PD-1  
214 which might have a low  $R^2$  due to their weak expression in healthy volunteers as they are  
215 prominently expressed in ill patients. Genes such as GAPDH, SDHA and ACTB showed poor  
216 performance and were discarded from the rest of the analytical studies as they were not  
217 linearly expressed with different RNA quantities. Overall, this confirms that FilmArray's IPP  
218 assays are linear enabling semi-quantification of genes' expression using RNA extracted from  
219 whole blood samples.

220

221

222 **Table 2. The global  $R^2$  values of the Immune Profiling Panel (IPP) markers**

| <b>A. Target Marker</b> | <b><math>R^2</math></b> | <b>B. Reference Marker</b> | <b><math>R^2</math></b> |
|-------------------------|-------------------------|----------------------------|-------------------------|
| IL6                     | 0.51                    | ACTB                       | 0.63                    |
| PD1                     | 0.63                    | SDHA                       | 0.74                    |
| IL10                    | 0.80                    | GAPDH                      | 0.78                    |
| IL1RN                   | 0.82                    | DECR1                      | 0.86                    |
| TGFB1                   | 0.85                    | TRAP1                      | 0.89                    |
| CD74                    | 0.85                    | PPIB                       | 0.92                    |
| IFNg                    | 0.86                    | HPRT1                      | 0.93                    |
| IL1B                    | 0.87                    | FPGS                       | 0.94                    |
| CD3D                    | 0.87                    |                            |                         |
| IL18                    | 0.88                    |                            |                         |
| NFkB                    | 0.88                    |                            |                         |
| CTLA4                   | 0.89                    |                            |                         |
| S100A9                  | 0.91                    |                            |                         |
| CD274                   | 0.91                    |                            |                         |
| CX3CR1                  | 0.92                    |                            |                         |
| TNFa                    | 0.93                    |                            |                         |

223

224

#### 225 **4. Equivalence to qPCR**

226 Three target genes were tested (S100A9, CD74 & CX3CR1) for equivalence between the two  
227 methods using Bland-Altman plots (Fig. 4). It was observed that all the three assays are within  
228 the limits of agreement demonstrated as  $\pm 1.96$  SD calculated from the mean difference  
229 horizontal line. S100A9 and CD74 were equivalent in both platforms as most of the points are  
230 around the mean difference line on the y-axis which is close to zero. Whereas in qPCR, CX3CR1  
231 presents a higher systematic bias of 5.9 Cq compared to IPP and a slight decreasing  
232 proportional bias associated with higher Cq values, but it still remains within the limits of  
233 agreement (Fig. 4A). After normalization of both data and re-computing the Bland-Altman plots,  
234 it can be observed that normalization helped eliminate the proportional bias with a slight

235 presence of a systemic bias between the two methods for the three markers (Fig. 4B). Both raw  
236 and normalized Cq analyses show that the two methods are within the limits of agreement. This  
237 analysis demonstrates the concordance between FilmArray's IPP and bench PCR which is a  
238 common reference method used for mRNA quantitation.

239

## 240 **5. Evaluation of FilmArray's IPP Signal Normalization**

241 Normalization is critical for the signal correction as the assays are tested in a fixed input  
242 volume of whole blood with an unknown quantity of RNA. Ten healthy volunteers were further  
243 analyzed to assess the effectiveness of the normalization strategy. Two RNA inputs (2 ng and 10  
244 ng) were tested and the expression signal was represented in boxplots before and after  
245 normalization. Fig. 5 illustrates 3 target genes (CD74, CX3CR1, and S100A9 selected as  
246 representative of the data). Fig. 5A shows a significant difference in expression level ( $p < 0.01$ )  
247 presented by the raw Cq values that are dependent on the RNA quantity (as previously  
248 inspected in the linearity study). Fig. 5B shows the same data after normalization with the  
249 internal reference genes. The results in Fig. 5B shows that after normalization the different RNA  
250 inputs were corrected and medians were not different.

251

## 252 **6. Clinical samples testing with IPP**

253 To ensure that the expected intra-variable expression of markers between patients with  
254 different immune status and healthy volunteers are conserved after normalization, we ran a  
255 proof of concept analysis on 10 healthy volunteers against 20 septic shock patients stratified

256 using mHLA-DR. Testing the samples with IPP showed differential expression of the target  
257 genes across the 3 tested populations. Fig. 6A shows 6 genes that were down-modulated in  
258 patients compared to healthy volunteers. A significant difference between the patients and the  
259 healthy group was observed in CD74, CX3CR1, CD3D, CTLA-4 and IFN- $\gamma$ . These assays cover  
260 diverse immune functions and are characteristics of monocyte anergy, lymphocyte exhaustion,  
261 antigen presentation, and pro-inflammatory cytokine production. All the previous dysfunctions  
262 and modulations are hallmarks of sepsis and can be clearly observed in both septic shock  
263 groups, the borderline and the low mHLA-DR expression patients, with more aggravation in the  
264 latter group. Fig. 6B shows 4 assays that were significantly up-modulated in patients that  
265 include IL-18, IL-10, IL1RN and S100A9. These markers are related to pro- and anti-  
266 inflammatory cytokines and danger associated molecular pattern (DAMPs) alarmins related to  
267 both arms of the immune response (innate and adaptive). Interestingly, the use of the stratified  
268 samples showed the ability of the IPP tool to clearly distinguish between healthy volunteers and  
269 patients with a various degree of immune-alterations, that specifically identified the  
270 immunosuppressed profiles among the septic shock patients.

## 271 **Discussion**

272 A proof of concept study was set up to assess the IPP's ability to semi-quantify immune-  
273 related markers on the technical and clinical levels using samples from both healthy volunteers  
274 and patients. The selected panel was able to differentiate between the healthy volunteers and  
275 the two groups of septic shock patients. Our results suggest the potential use of IPP as a tool to  
276 stratify patients according to their immune status.

277           The recent advances in diagnostic techniques such as multiplexing PCR, bead-based  
278 proteomics and cell phenotyping panels approaches are now shaping the landscape of patient  
279 care and advances towards precision medicine (14). As previously reported in the literature,  
280 patients in the ICU, especially septic patients, are heterogeneous and their immune response is  
281 highly dynamic. However, patient management in the ICU remains a “bundle of care” with only  
282 a slight modification according to the clinicians’ experience rather than personalized care (4,  
283 26). To reduce this diagnostic gap in detecting impaired immune responses , many research  
284 efforts sought after immune profiling approaches to stratify patients at risk (13, 27). To develop  
285 a comprehensive immune profiling tool, a panel of biomarkers should be considered to cover  
286 various immune functions as described previously, including the innate, adaptive, pro-and anti-  
287 inflammatory immune responses. Having such tool as a point of care will probably help  
288 clinicians achieve patient-guided management and therapies.

289           In this work, we present the first proof of concept on the Immune Profiling Panel (IPP), a  
290 new multiplex molecular tool to assess critically-ill patients’ immune status in the FilmArray  
291 System. FilmArray’s microbiology syndromic panels have been reported in the literature for  
292 their robust and reproducible results but they mainly provide qualitative results for pathogen  
293 detection (16, 17, 28). In the IPP tool, a different approach was sought, and we demonstrated  
294 the ability of the platform to semi-quantify immune host-response markers. Even though the  
295 capacity of the pouch reaches up to 45 assays, we chose to use only 16 target genes and test 8  
296 reference genes (Fig. 1) as a prototype. Developments are currently undergoing to achieve a  
297 higher multiplexing capacity of the IPP tool.

298           The IPP pouches were analytically evaluated for repeatability, for assay's linearity and  
299 was compared to qPCR which is a well-established gold standard for analyzing the  
300 transcriptome from whole blood. As explained by the MIQE guidelines for qPCR validation,  
301 repeatability is the intra-assay variation reported by SD or variance in Cq values (29). Most of  
302 the assays had a low variance, except for only SDHA which was highly variable (Fig. 2) and  
303 recorded the highest coefficient variance of 19 % (data not shown), and was thus discarded  
304 later. All the assays were further investigated in the linearity study (Fig. 3) in a 3-log linear range  
305 of RNA inputs. We confirmed that the majority of the markers in the panel had an  $R^2$  ranging  
306 from 0.8 - 0.95. These values are slightly lower than the recommended  $R^2$  ( $\geq 0.98$ ) for classic  
307 quantitative PCR (30). However, the qPCR recommendations only address a one-step  
308 amplification PCR whereas the  $R^2$  presented here covers the whole process from sample input  
309 to result. Equivalence studies to classic qPCR showed that the assay results were concordant  
310 with assays from IPP with a low bias for CX3CR1 (Fig.4). The observed  $R^2$  and bias might be  
311 explained by several reasons such as the integration of several steps in the platform that  
312 include reverse transcription, multiplex amplifications that is followed by a dilution step just  
313 before the second round of nested PCR that might slightly influence the quantity of RNA and  
314 the signal at the end of the run. Other factors might be the high multiplexing capacity of the  
315 platform as some primers might interact and affect one another within the multiplexing  
316 environment, in addition to the natural variability in expression profiles of healthy volunteer  
317 samples obtained from the blood bank. All these factors make the standard guidelines more  
318 adaptable to classic qPCR and are partially applicable to the FilmArray System assessment.  
319 Nevertheless, the achieved linearity is acceptable and allows assays' semi-quantification of



320 mRNA from whole blood. Based on the analyses, the following assays SDHA and ACTB were  
321 discarded and were not included in the later assessment steps as they likely have a design or  
322 compatibility issues. The rest of the assays that were identified in the variability study or had an  
323  $R^2$  lower than 0.8 were investigated and will either re-designed or removed from the next  
324 version of the tool. Finally, since the intended test specimen or matrix is whole blood, the  
325 effectiveness of signal normalization was confirmed by the successful correction of the varying  
326 RNA input among individuals that can influence the RNA quantity within the sample (Fig. 5).

327         A decrease in mHLA-DR expression measured by flow cytometry is widely accepted as a  
328 marker of immune suppression in critically-ill patients. mHLA-DR expression lower than 30 %  
329 was often associated with mortality and risk of developing secondary infections at day 3-4 after  
330 sepsis onset (18, 31). When IPP was tested on healthy and septic shock patients (Fig. 6),  
331 differential expression was shown and a basic stratification of patients was possible according  
332 to their immune profile. For instance, the panel successfully pointed out that low mHLA-DR  
333 patients suffered more profound immune dysfunction than the borderline mHLA-DR patients.  
334 This was highlighted by the down-modulation of CD74 and CX3CR1, CD3D and CTLA-4 markers  
335 that are affiliated to the innate and adaptive immune responses, respectively, compared to  
336 healthy subjects. Other immune dysfunctions that were observed include alterations in both  
337 pro- and anti-inflammatory markers (IL-18, IL-10 and IFN- $\gamma$ ). These markers are reported in the  
338 literature as hallmarks of sepsis syndrome and are indicators of an immunosuppressed profile  
339 in septic shock patients (2). The importance of having an immune profiling panel lies in the  
340 valuable information provided by the tool about several aspects of the immune response,

341 dysfunctions and physiopathologies that cannot be identified by measuring only one aspect or a  
342 unique marker such as HLA-DR.

343         Recent studies were proposed by researchers to overcome the diagnostic gap in  
344 immune dysfunction profiling using different platforms. For instance, a microfluidic biochip has  
345 been developed based on the quantification of CD64 from circulating neutrophils in the blood  
346 and enumerating the lymphocyte count using only 10  $\mu$ l of blood from patients in 30 minutes.  
347 The microfluidic chip technology could potentially stratify sepsis in the patient population (32).  
348 This approach is rather appealing but due to the heterogeneity of immune responses in sepsis  
349 patients, both the diversity and number of the addressed biomarkers become key in the precise  
350 stratification, diagnosis and prognosis. Similarly, interesting work by Morris *et al.* based on a 4-  
351 hours flow cytometry protocol assessing neutrophil CD88, percentage of regulatory T cells  
352 ( $T_{regs}$ ), and mHLA-DR expression demonstrated the potential to predict secondary infections in  
353 septic patients (6). However, the main challenges that hinder the use of flow cytometry at the  
354 bedside, remains that it is mainly operated and interpreted by skilled personnel which makes it  
355 hard to standardize, and requires the presence of well-equipped laboratories that work round  
356 the clock which is not the case in most hospitals. These research efforts re-enforce the need for  
357 a tool such as IPP in the ICU, as it includes a panel of markers that cover diverse immune  
358 functions and can identify different patient profiles. The fact that FilmArray is a fully automated  
359 and closed system with only 2 minutes of hands-on time, limits the risk of variability and  
360 facilitates its implementation. The use of whole blood as an input and the availability of results  
361 within the hour makes it possible to be installed at the central laboratory or at the bedside,

362 thus making it accessible 24/7. Our proof of concept provides great promise to apply molecular  
363 multiplexing technology in immune profiling of critically-ill patients as a point of care in the ICU.

364 In this pilot study, we have several limitations such as the small sample size of patients,  
365 as most of our technical evaluations were on healthy volunteers. In addition, markers  
366 performance such as validity and ability to predict clinical outcomes still need to be addressed  
367 in a dedicated clinical cohort. The further addition of assays in next pouch versions will require  
368 a full analytical validation and evaluating the compatibility of all primers in the multiplexing  
369 environment. Our upcoming goal is to increase the multiplexing capacity of the panel in such a  
370 way to have a highly informative tool reflecting the immune status of a patient at a given time.  
371 The final panel will be more comprehensive, having a simplified readout that can be integrated  
372 into a day-to-day clinical practice in the ICU. This will provide personalized information for each  
373 patient and will enable clinicians to precisely manage critically-ill and sepsis patients according  
374 to their immune profile.

## 375 **Conclusion**

376 The Immune Profiling Panel is a new molecular multiplex tool that uses the FilmArray  
377 System which provides a transcriptomic immune profile of critically ill patients in the ICU. The  
378 analytical assessment proved the ability of the selected panel to measure immune-related gene  
379 expression from blood in both healthy and septic shock patients. The easiness of use and rapid  
380 time-to-result of IPP proves its great potential for the development of a full capacity and  
381 automated tool to be used at the bedside. The IPP tool could be used in the future to monitor

382 and stratify patients at high risk of secondary infections and mortality, based on their immune  
383 status, enabling personalized patient care.

384

### 385 **Abbreviations**

386 IPP : Immune Profiling Panel; ICU: Intensive Care Unit; mHLA-DR: monocytic Human Leukocyte  
387 Antigen-DR; Cq: quantification cycle; RT: Reverse Transcription; qPCR: quantitative polymerase  
388 chain reaction; RNA: RiboNucleic Acid; SD: Standard Deviation.

### 389 **Acknowledgements**

390 We acknowledge Estelle Peronnet, Elisabeth Cerrato and Boris Meunier for their  
391 technical support and sharing their expertise to enrich our study. We extend our gratitude to  
392 the Immunospesis-1 study group for providing us with the septic shock clinical samples.

### 393 **Declarations**

#### 394 **Ethics approval and consent to participate**

395 Healthy volunteers: Whole blood from healthy volunteers collected in PAXgene tubes was  
396 obtained from the EFS (Etablissement Français du Sang, French blood bank, Grenoble).  
397 Informed consents from the blood donors were obtained and their personal data were  
398 anonymized at time of blood donation and before the blood transfer to our facility according to  
399 EFS standard regulations for blood donation.

400 Septic shock patients: Immunosepsis-1 cohort was approved by the local ethics committee  
401 (Comité de Protection des Personnes Sud-Est II #IRB 11236). A non-opposition to cohort  
402 inclusion was recorded from every patient or the patient's relative. Since it was a non-  
403 interventional trial and complementary blood samples were obtained during patients' routine  
404 blood sampling and tested after the completion of routine follow-up tests, no informed consent  
405 was required. The Immunosepsis-1 study is registered at the French Ministry of Research and  
406 Teaching (#DC-2008-509), at the Commission Nationale de l'Informatique et des Libertés and  
407 on [clinicaltrials.gov](https://clinicaltrials.gov) (NCT02803346).

#### 408 **Consent for publication**

409 Not applicable.

#### 410 **Availability of data and materials**

411 Kindly contact the corresponding author for the data. Data can be provided upon motivated  
412 requests.

#### 413 **Competing interests**

414 DMT, LV, AB, SB, JLM, AP, ACH, VM, JYM, KB-P, FM and JT are employed by an *in-vitro*  
415 diagnostic company, bioMérieux. The remaining authors have no conflict of interest to declare.

#### 416 **Funding**

417 This work was supported by bioMérieux. DMT, LV, AP, FM and JT are part of the  
418 European Sepsis Academy funded by the European Union's Horizon-2020 research and  
419 innovation program under grant agreement No. 676129 from the Marie Skłodowska-Curie  
420 Innovative Training Networks (ITN).

## 421 **Authors' contributions**

422 All authors contributed to the manuscript structuring and critical revision for important  
423 intellectual content, read and approved the final manuscript. LV, AB, FM, JYM and JT designed  
424 the experiments. DMT and AB performed the experiments and the statistical analyses. DMT  
425 drafted the manuscript. DMT, LV and JT made substantial contributions to the conception and  
426 design of the study and final data interpretation.

427

## 428 **References**

- 429 1. Singer M, Deutschman CS, Seymour CW, Shankar-Hari M, Annane D, Bauer M, et al. The Third  
430 International Consensus Definitions for Sepsis and Septic Shock (Sepsis-3) Consensus Definitions for  
431 Sepsis and Septic Shock Consensus Definitions for Sepsis and Septic Shock. *JAMA*. 2016;315(8):801-10.
- 432 2. Hotchkiss RS, Monneret G, Payen D. Sepsis-induced immunosuppression: from cellular  
433 dysfunctions to immunotherapy. *Nat Rev Immunol*. 2013;13(12):862-74.
- 434 3. van der Poll T, van de Veerdonk FL, Scicluna BP, Netea MG. The immunopathology of sepsis and  
435 potential therapeutic targets. *Nat Rev Immunol*. 2017;17:407.
- 436 4. Vincent J-L. The coming era of precision medicine for intensive care. *Crit Care*. 2017;21(3):314.
- 437 5. Gossez M, Rimmelé T, Andrieu T, Debord S, Bayle F, Malcus C, et al. Proof of concept study of  
438 mass cytometry in septic shock patients reveals novel immune alterations. *Sci Rep*. 2018;8(1):17296.
- 439 6. Conway Morris A, Datta D, Shankar-Hari M, Stephen J, Weir CJ, Rennie J, et al. Cell-surface  
440 signatures of immune dysfunction risk-stratify critically ill patients: INFECT study. *Intensive Care Med*.  
441 2018;44(5):627-35.
- 442 7. Pierrakos C, Vincent J-L. Sepsis biomarkers: a review. *Crit Care*. 2010;14(1):R15.
- 443 8. Reinhart K, Bauer M, Riedemann NC, Hartog CS. New approaches to sepsis: molecular  
444 diagnostics and biomarkers. *Clin Microbiol Rev*. 2012;25(4):609-34.

- 445 9. Davenport EE, Burnham KL, Radhakrishnan J, Humburg P, Hutton P, Mills TC, et al. Genomic  
446 landscape of the individual host response and outcomes in sepsis: a prospective cohort study. *Lancet*  
447 *Respir Med*. 2016;4(4):259-71.
- 448 10. Scicluna BP, van Vught LA, Zwinderman AH, Wiewel MA, Davenport EE, Burnham KL, et al.  
449 Classification of patients with sepsis according to blood genomic endotype: a prospective cohort study.  
450 *Lancet Respir Med*. 2017;5(10):816-26.
- 451 11. Sweeney TE, Perumal TM, Henao R, Nichols M, Howrylak JA, Choi AM, et al. A community  
452 approach to mortality prediction in sepsis via gene expression analysis. *Nat Commun*. 2018;9(1):694.
- 453 12. Maslove DM, Shapira T, Tyryshkin K, Veldhoen RA, Marshall JC, Muscedere J. Validation of  
454 diagnostic gene sets to identify critically ill patients with sepsis. *J Crit Care*. 2019;49:92-8.
- 455 13. Albert-Vega C, Tawfik DM, Trouillet-Assant S, Vachot L, Mallet F, Textoris J. Immune Functional  
456 Assays, From Custom to Standardized Tests for Precision Medicine. *Front Immunol*. 2018;9(2367).
- 457 14. Rello J, van Engelen TSR, Alp E, Calandra T, Cattoir V, Kern WV, et al. Towards precision medicine  
458 in sepsis: a position paper from the European Society of Clinical Microbiology and Infectious Diseases.  
459 *Clin Microbiol Infect*. 2018;24(12):1264-72.
- 460 15. Lydon EC, Ko ER, Tsalik EL. The host response as a tool for infectious disease diagnosis and  
461 management *Expert Rev Mol Diagn*. 2018;18(8):723-38.
- 462 16. Hanson KE, Couturier MR. Multiplexed Molecular Diagnostics for Respiratory, Gastrointestinal,  
463 and Central Nervous System Infections. *Clin Infect Dis*. 2016;63(10):1361-7.
- 464 17. Poritz MA, Blaschke AJ, Byington CL, Meyers L, Nilsson K, Jones DE, et al. FilmArray, an  
465 Automated Nested Multiplex PCR System for Multi-Pathogen Detection: Development and Application  
466 to Respiratory Tract Infection. *PLoS One*. 2011;6(10):e26047.
- 467 18. Monneret G, Lepape A, Voirin N, Bohé J, Venet F, Debard A-L, et al. Persisting low monocyte  
468 human leukocyte antigen-DR expression predicts mortality in septic shock. *Intensive Care Med*.  
469 2006;32(8):1175-83.
- 470 19. Renaud C, Crowley J, Jerome KR, Kuypers J. Comparison of FilmArray Respiratory Panel and  
471 laboratory-developed real-time reverse transcription–polymerase chain reaction assays for respiratory  
472 virus detection. *Diagn Microbiol Infect Dis*. 2012;74(4):379-83.
- 473 20. Landelle C, Lepape A, Francais A, Tognet E, Thizy H, Voirin N, et al. Nosocomial infection after  
474 septic shock among intensive care unit patients. *Infect Control Hosp Epidemiol*. 2008;29(11):1054-65.
- 475 21. Peronnet E, Venet F, Maucourt-Boulch D, Friggeri A, Cour M, Argaud L, et al. Association between  
476 mRNA expression of CD74 and IL10 and risk of ICU-acquired infections: a multicenter cohort study.  
477 *Intensive Care Med*. 2017;43(7):1013-20.
- 478 22. Fontaine M, Planel S, Peronnet E, Turrel-Davin F, Piriou V, Pachot A, et al. S100A8/A9 mRNA  
479 Induction in an Ex Vivo Model of Endotoxin Tolerance: Roles of IL-10 and IFN $\gamma$ . *PLoS One*.  
480 2014;9(6):e100909.
- 481 23. Pachot A, Cazalis M-A, Venet F, Turrel F, Faudot C, Voirin N, et al. Decreased Expression of the  
482 Fractalkine Receptor CX3CR1 on Circulating Monocytes as New Feature of Sepsis-Induced  
483 Immunosuppression. *J Immunol*. 2008;180(9):6421.
- 484 24. Boomer JS, To K, Chang KC, Takasu O, Osborne DF, Walton AH, et al. Immunosuppression in  
485 Patients Who Die of Sepsis and Multiple Organ Failure. *JAMA*. 2011;306(23):2594-605.
- 486 25. Montgomery JL, Nawrocki J, Deneris M, Jones J, Crisp RJ, Aydin M, et al. Rapid Discrimination of  
487 Viral and Bacterial Infections by Host Transcriptomic Analysis Using FilmArray System. *ASM-Microbe*,  
488 New Orleans. 2017;Abstract 3472.
- 489 26. Schaack D, Siegler BH, Tamulyte S, Weigand MA, Uhle F. The immunosuppressive face of sepsis  
490 early on intensive care unit-A large-scale microarray meta-analysis. *PLoS One*. 2018;13(6):e0198555.

- 491 27. Bermejo-Martin JF, Almansa R, Martin-Fernandez M, Menendez R, Torres A. Immunological  
492 profiling to assess disease severity and prognosis in community-acquired pneumonia. *Lancet Respir Med.*  
493 2017;5(12):e35-e6.
- 494 28. Leber AL, Everhart K, Balada-Llasat J-M, Cullison J, Daly J, Holt S, et al. Multicenter Evaluation of  
495 BioFire FilmArray Meningitis/Encephalitis Panel for Detection of Bacteria, Viruses, and Yeast in  
496 Cerebrospinal Fluid Specimens. *J Clin Microbiol.* 2016;54(9):2251.
- 497 29. Bustin SA, Benes V, Garson JA, Hellems J, Huggett J, Kubista M, et al. The MIQE guidelines:  
498 minimum information for publication of quantitative real-time PCR experiments. *Clin Chem.*  
499 2009;55(4):611-22.
- 500 30. Broeders S, Huber I, Grohmann L, Berben G, Taverniers I, Mazzara M, et al. Guidelines for  
501 validation of qualitative real-time PCR methods. *Trends Food Sci Technol.* 2014;37(2):115-26.
- 502 31. Venet F, Lukaszewicz A-C, Payen D, Hotchkiss R, Monneret G. Monitoring the immune response  
503 in sepsis: a rational approach to administration of immunoadjuvant therapies. *Curr Opin Immunol.*  
504 2013;25(4):477-83.
- 505 32. Hassan U, Ghonge T, Reddy Jr B, Patel M, Rappleye M, Taneja I, et al. A point-of-care microfluidic  
506 biochip for quantification of CD64 expression from whole blood for sepsis stratification. *Nat Commun.*  
507 2017;8:15949.

508

## 509 **Legends**

510 **Fig. 1** The immune Profiling Panel (IPP). The figure illustrates the selected markers of the panel  
511 that includes 16 target genes and describes the different pathways targeted. The panel also  
512 features 8 reference genes for signal normalization. The panel of markers was selected to target  
513 different arms of the immune responses (innate and adaptive), several immune functions (pro-  
514 and anti-inflammatory cytokines) and immune pathways.

515 **Fig. 2** PAXgene stabilized whole blood from a single healthy donor was tested in triplicates to  
516 evaluate the variability of the assay in the IPP tool. The variance in Cq values of 4 different lots  
517 given as A, B C and D are presented on the y-axis calculated from the triplicates of the markers  
518 expression across each lot with a cut-off + 1 SD. The name of the target genes above or on the  
519 line of variance cut-off are indicated in the plot.



520 **Fig. 3** Linearity study of reference and target assays. Extracted RNA from 10 healthy volunteers  
521 was tested in IPP using 5 different RNA quantities (0.5-100 ng). The linear model of the Raw Cq  
522 values is plotted against log 10 of the RNA quantities. The slope-intercept equation of each  
523 model appears on the plot along with the R<sup>2</sup> values.

524 **Fig. 4** Bland-Altman analysis of 3 target markers expression in the IPP pouch compared to qPCR  
525 results. Whole blood from PAXgene tubes of 30 healthy volunteers samples was tested in  
526 FilmArray and extracted RNA samples from the same volunteers was tested in qPCR for the  
527 equivalence study. The red horizontal line represents the mean difference and estimates the  
528 systemic bias between the methods, the dispersion of points is enclosed within  $\pm 1.96$  SD limits  
529 of agreement is presented as dashed lines. All three genes are within the limits of agreement, **A**.  
530 Raw data **B**. Normalized.

531 **Fig. 5** Evaluation of Data normalization: The raw Cq values and normalized expression values are  
532 expressed in an inverted y-axis to facilitate interpretation. RNA samples from 10 healthy  
533 volunteers extracted from PAXgene tubes were directly injected in the IPP pouch in two  
534 different quantities and tested in FilmArray. The results were tested for significance using  
535 paired Wilcoxon signed rank test (where \* is  $p < 0.05$  and NS as not-significant). **A**. Shows the  
536 raw Cq values of 10 healthy volunteers expressed as boxplots showing the 2 RNA quantities  
537 tested; 2 (blue) and 10 (green) ng. **B**. Shows the boxplots after Cq normalization with no  
538 significant difference observed between 2 quantities in the respective marker.

539 **Fig. 6** Testing the immune profiling panel on 10 healthy volunteers and 20 septic shock patients:  
540 10 in the borderline mHLA-DR group and 10 in the low mHLA-DR group. The y-axes representing

541 normalized values are inverted to facilitate interpretation. A quantity of 10ng of each RNA  
542 sample was injected directly in the IPP pouches. Normalized expression values were compared  
543 across groups using Mann-Whitney U test for significance. **A.** Shows the markers that were  
544 down-modulated in the patient groups compared to the healthy volunteers. **B.** Illustrates  
545 markers that were up-modulated in patients against healthy volunteers (where NS:  $p > 0.05$ , \*:  
546  $p < 0.05$ , \*\*:  $p < 0.01$  and \*\*\*:  $p < 0.001$ )

# The Immune Profiling Panel (IPP)

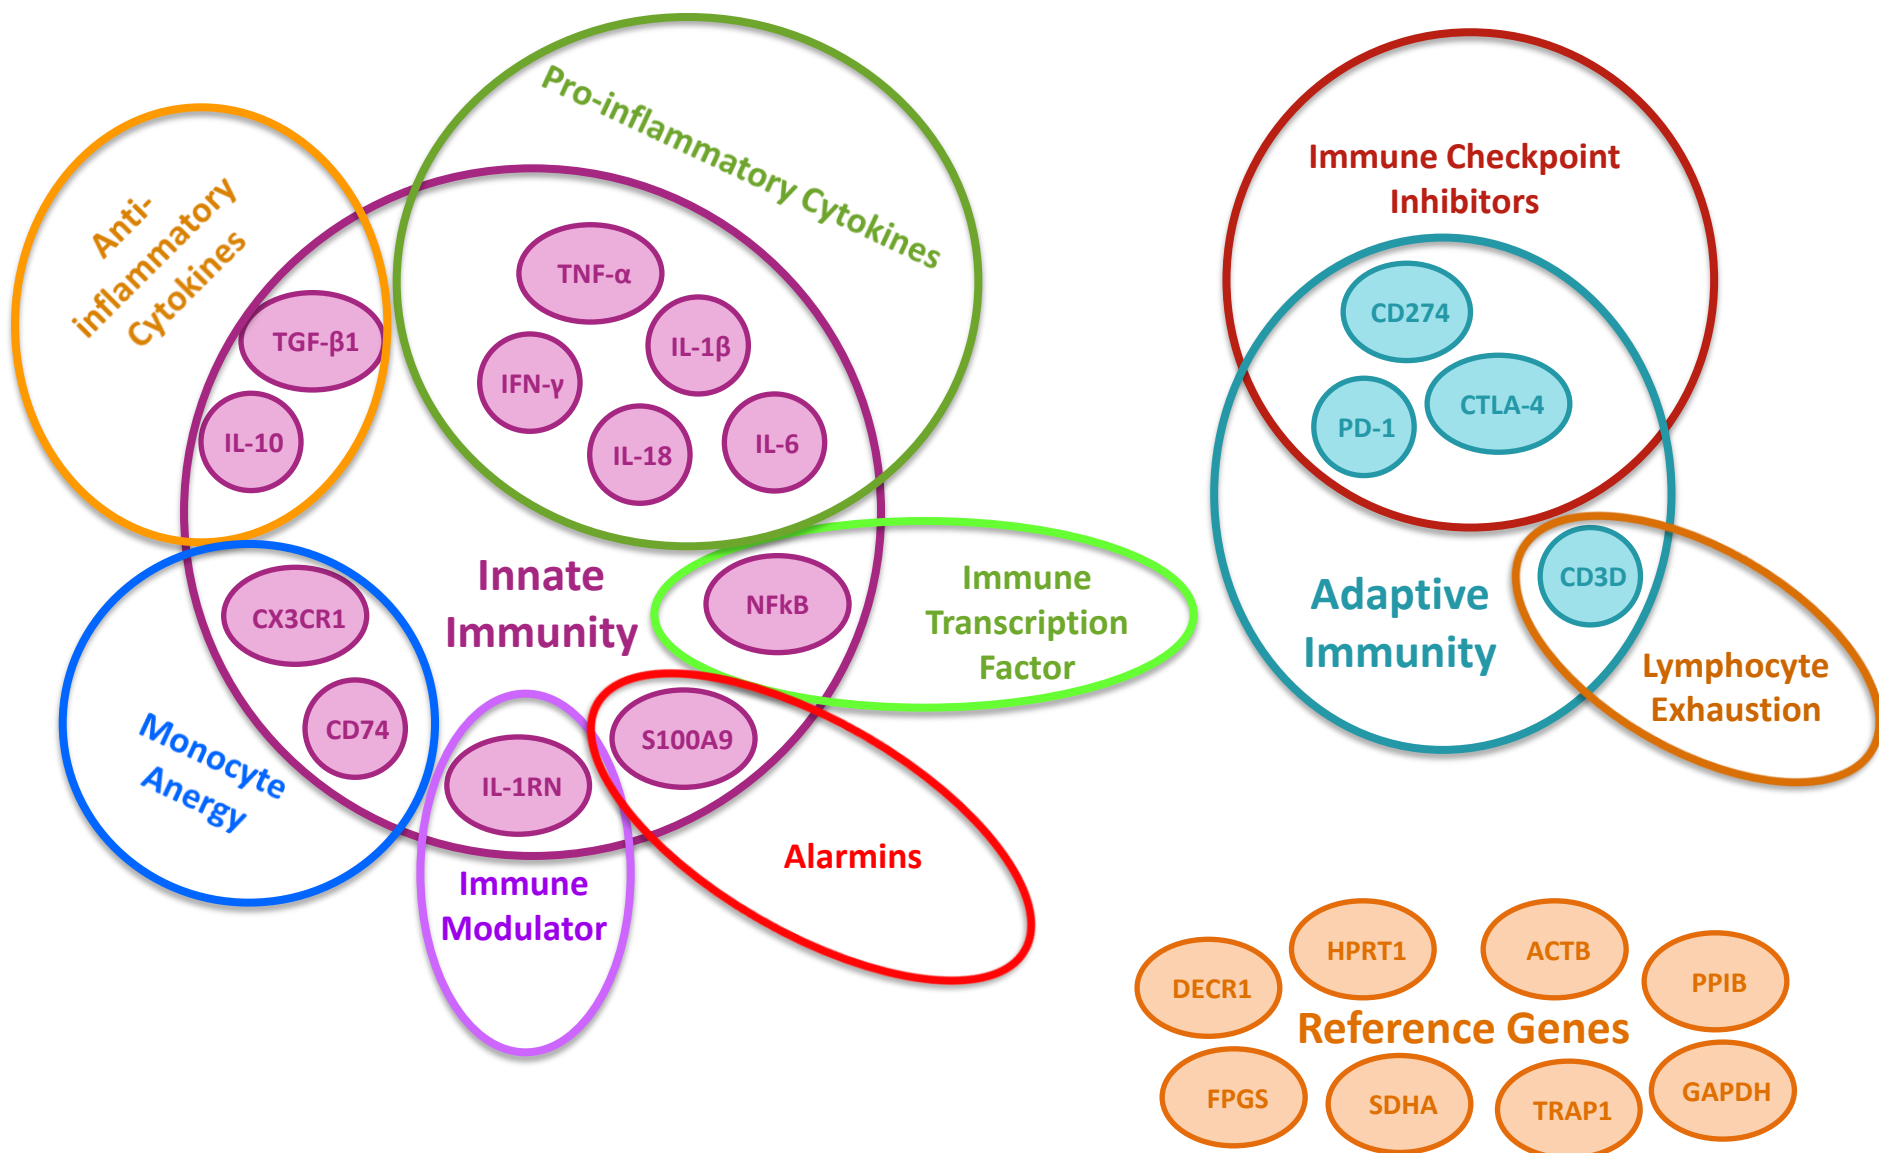

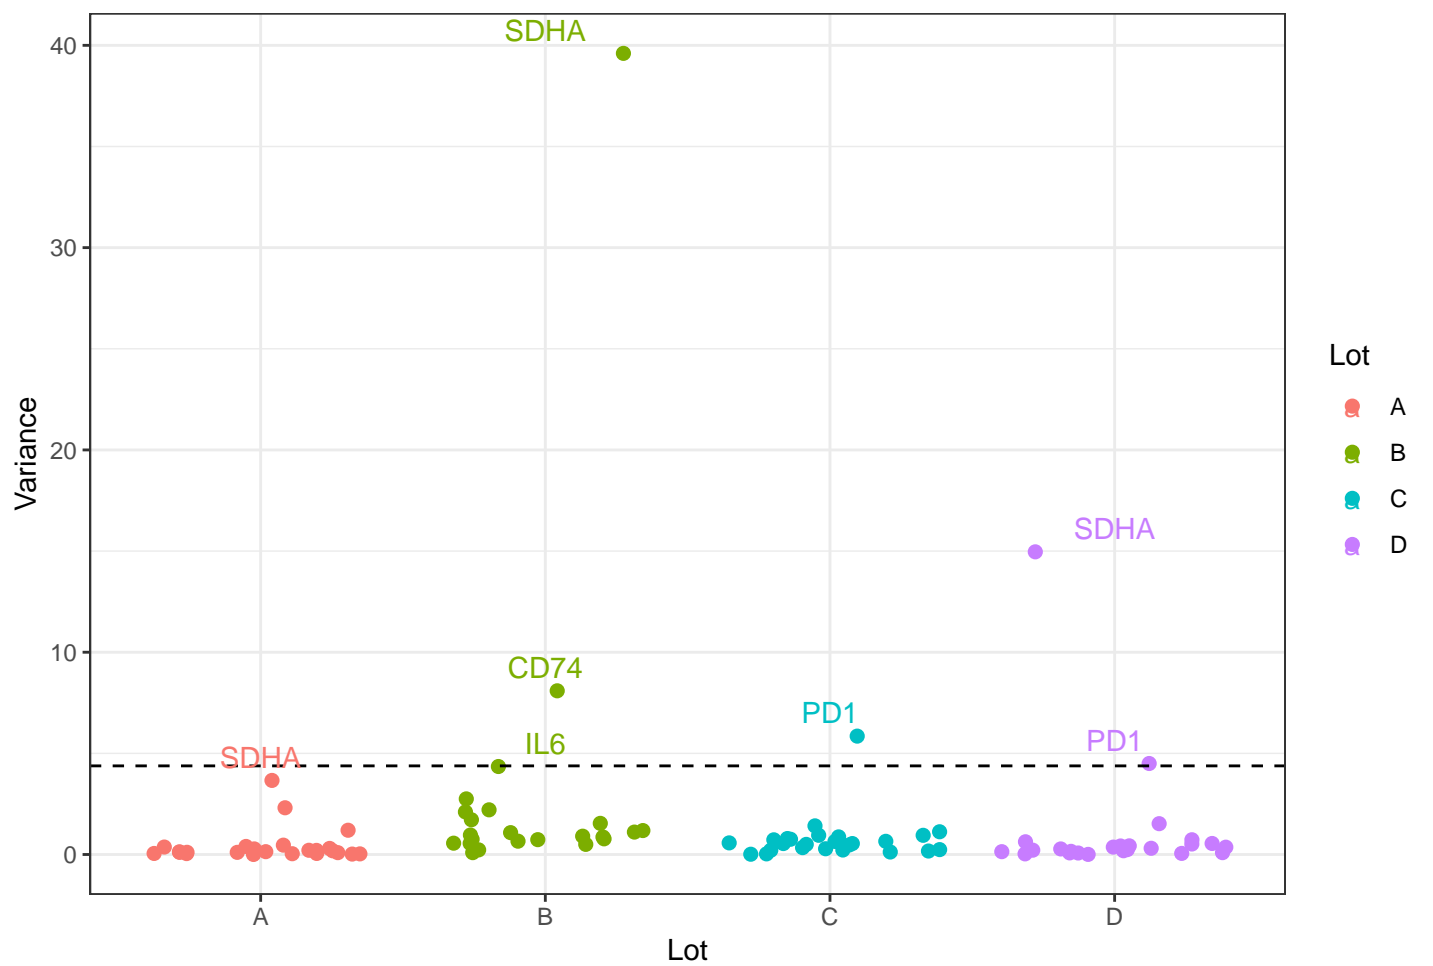

**DECR1**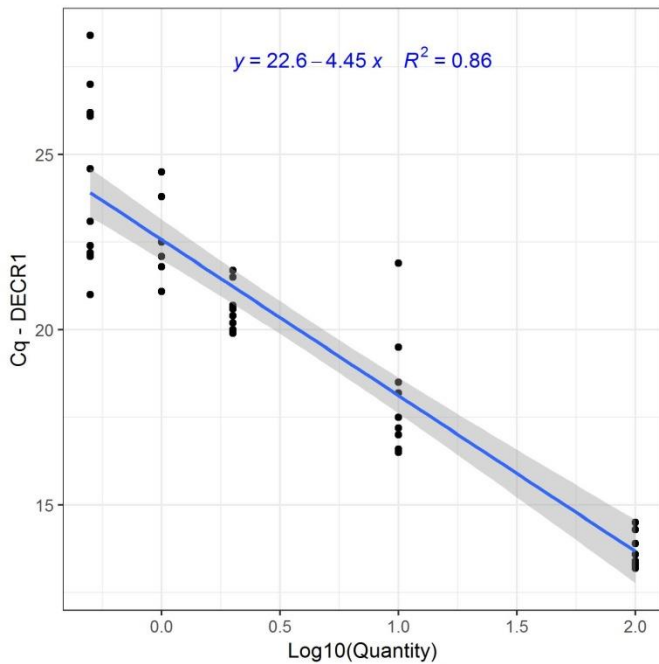**HPRT1**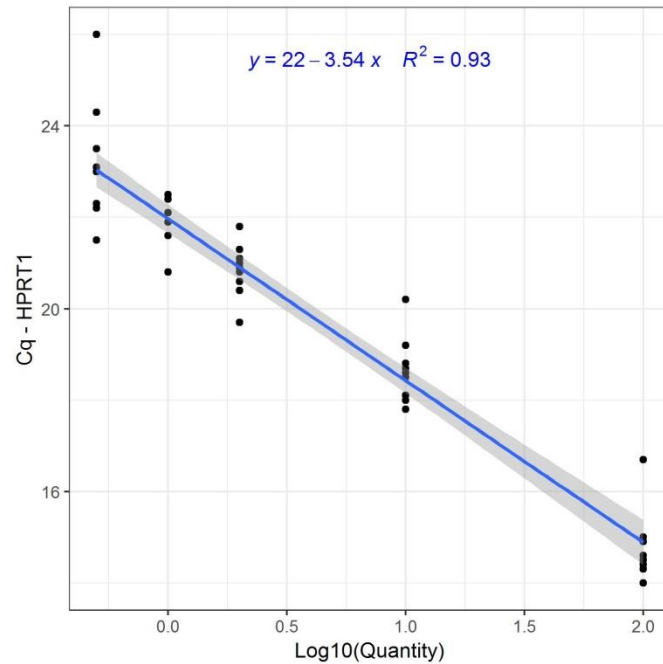**PPIB**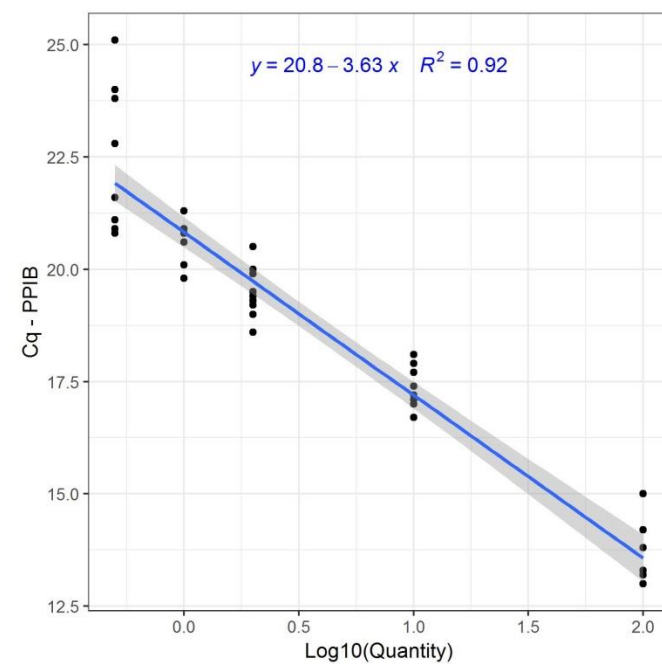**CD74**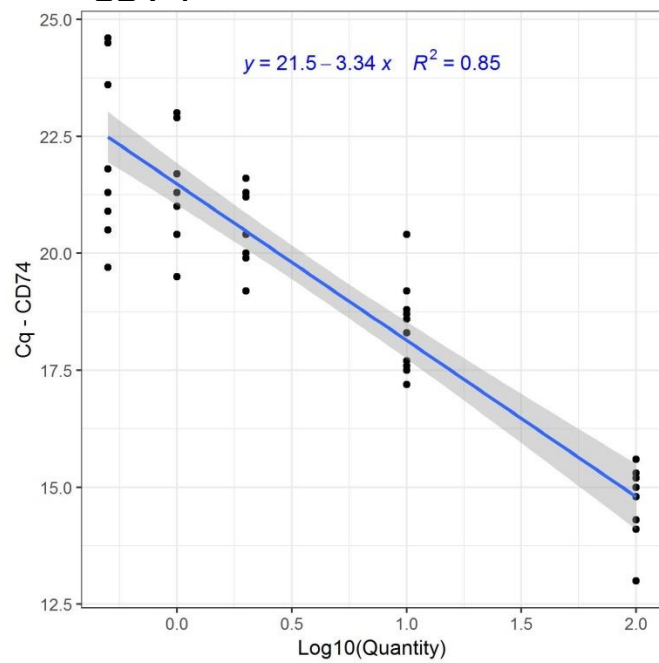**CX3CR1**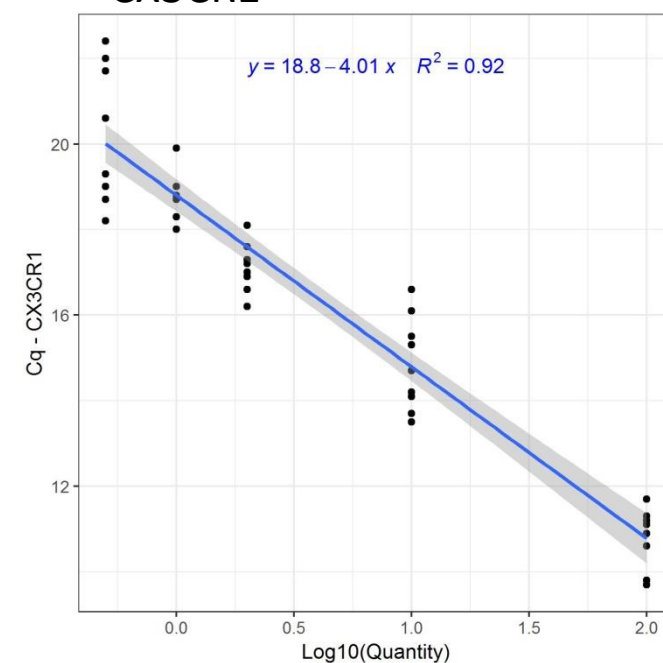**S100A9**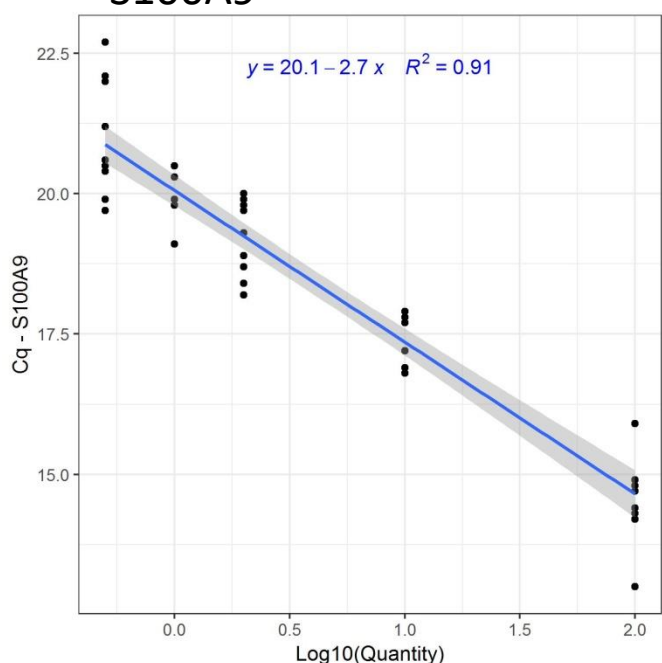

**A.**

CD74

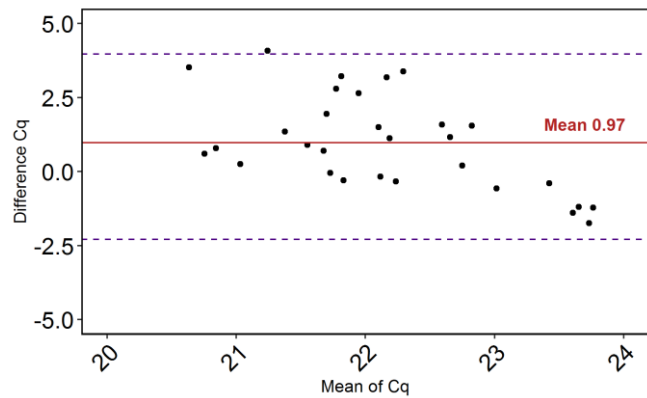

CX3CR1

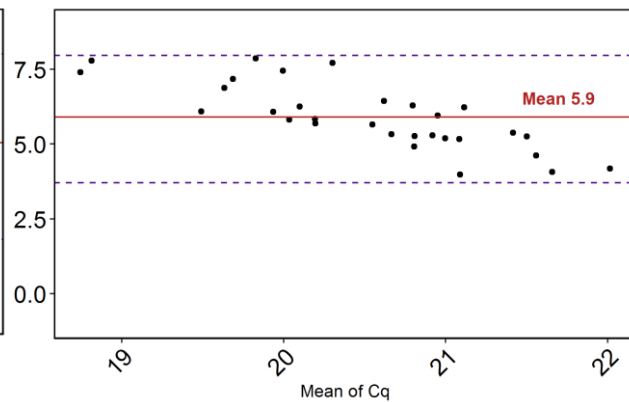

S100A9

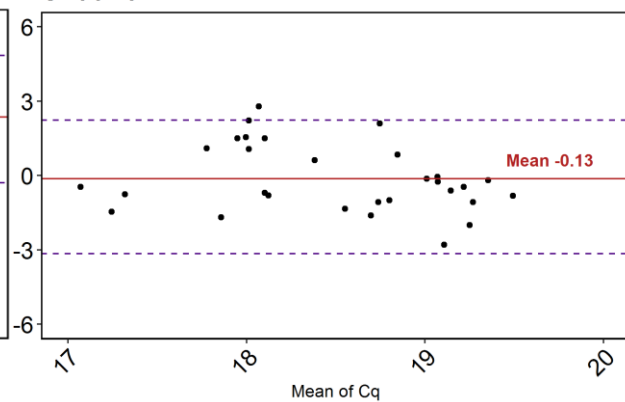**B.**

CD74 Normalized

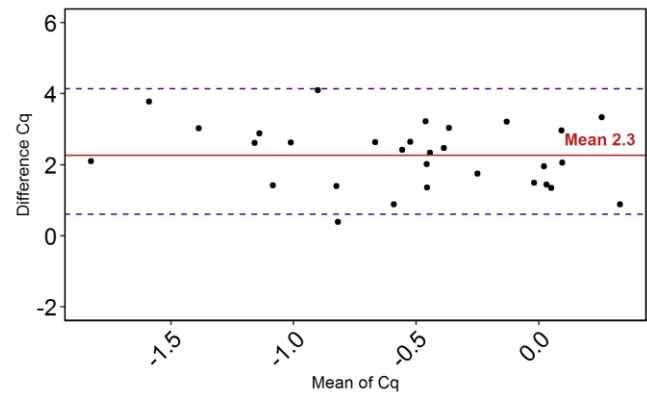

CX3CR1 Normalized

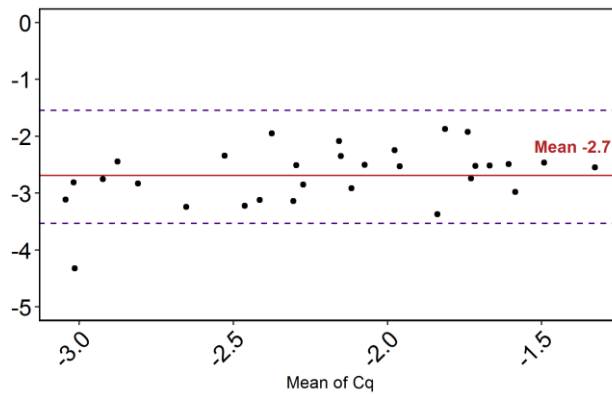

S100A9 Normalized

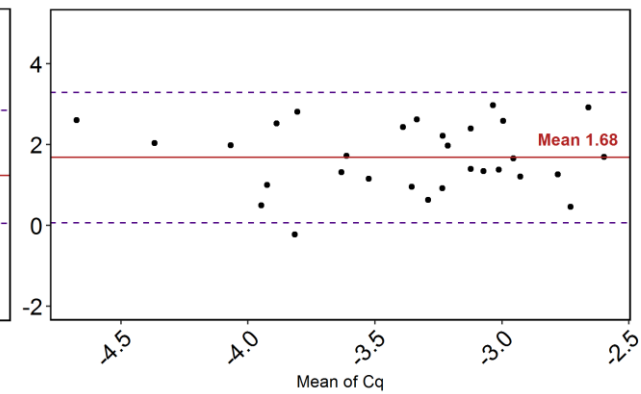

## A. Raw Data

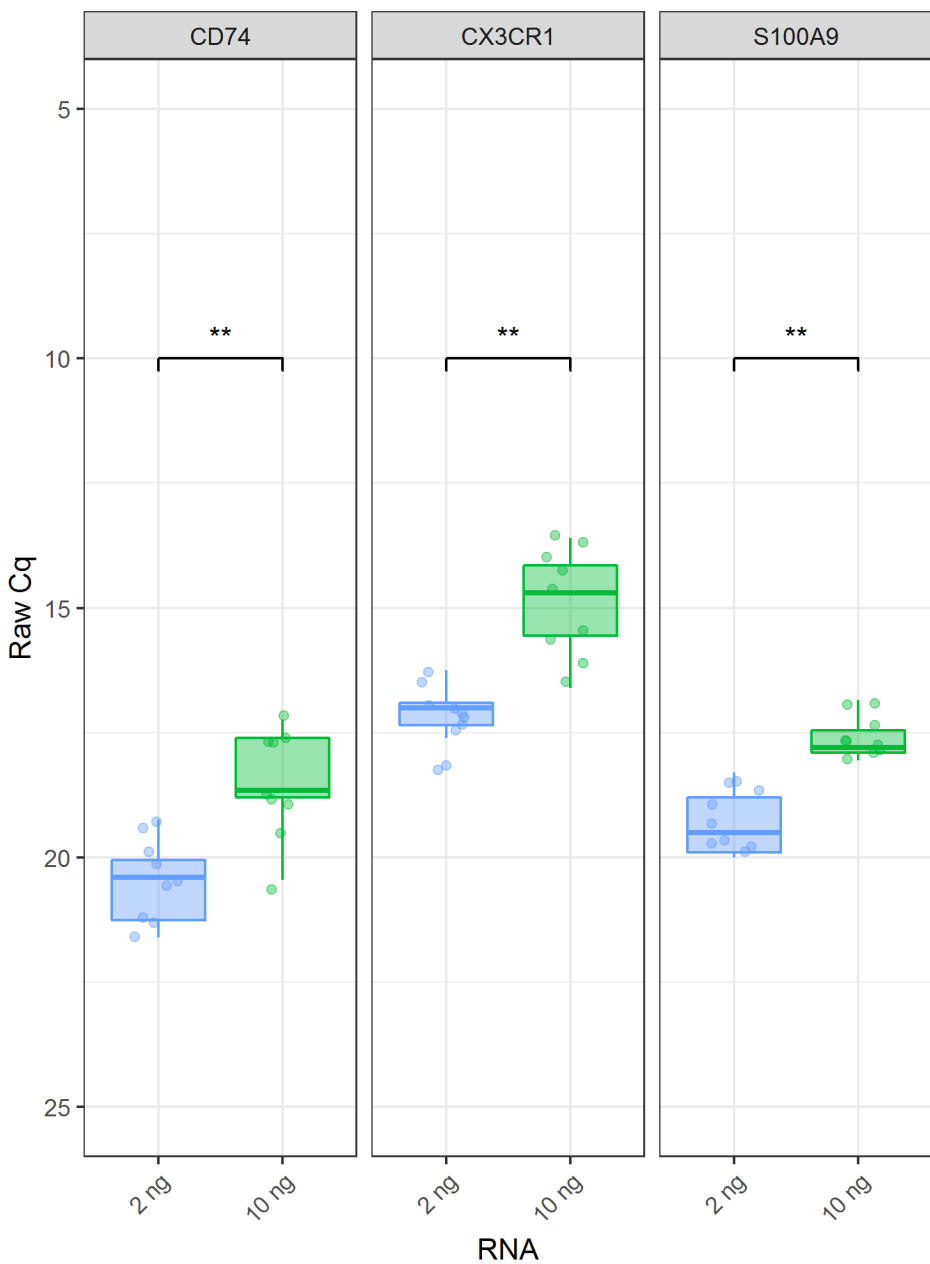

## B. Normalized data

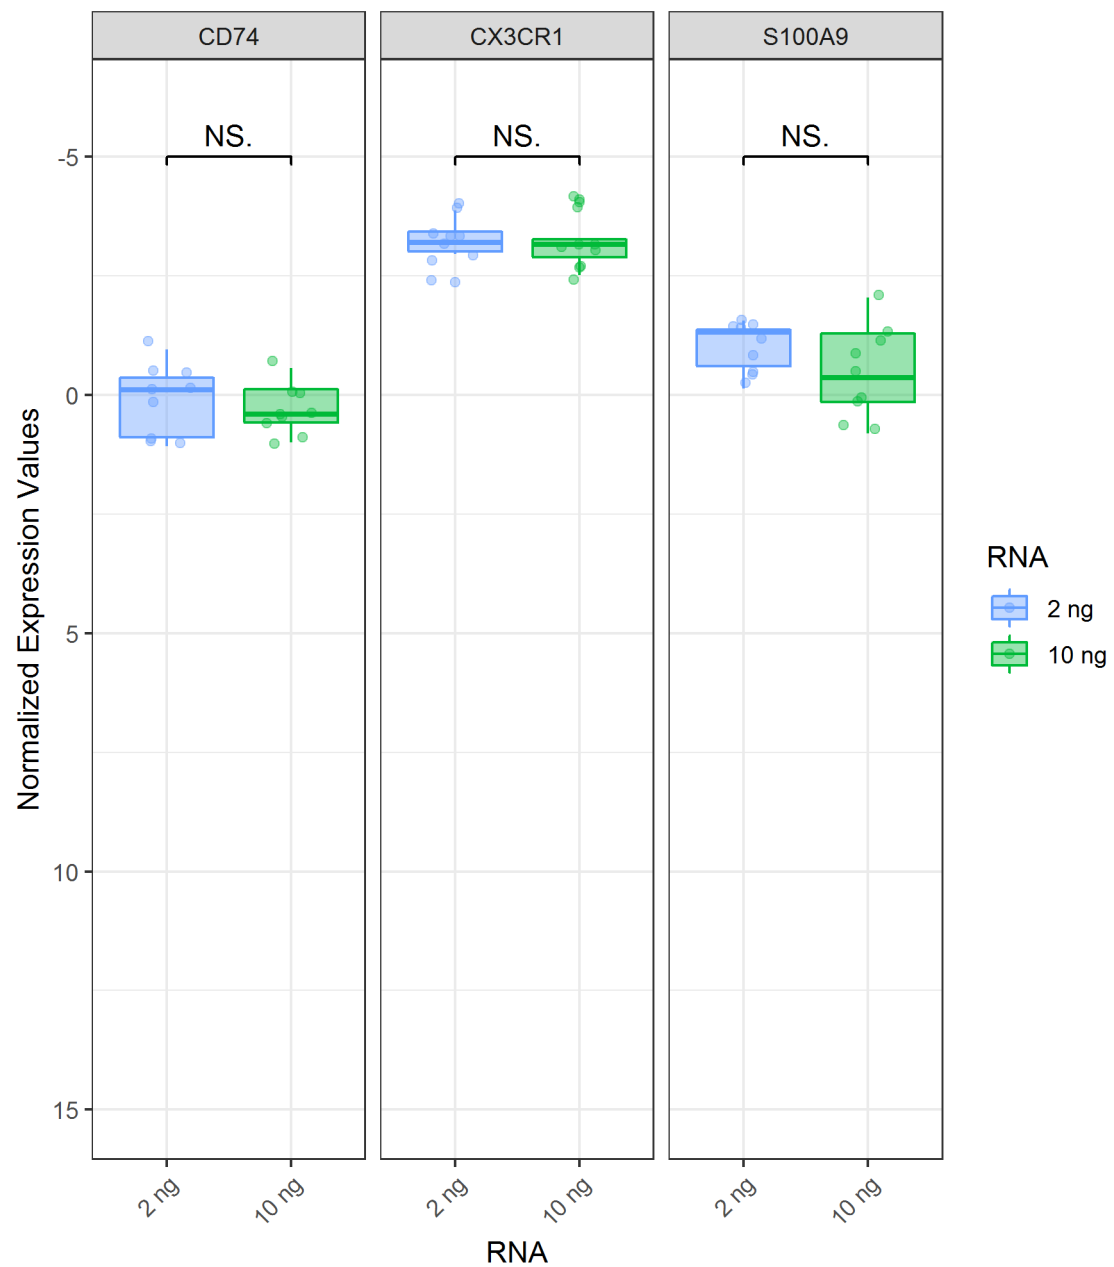

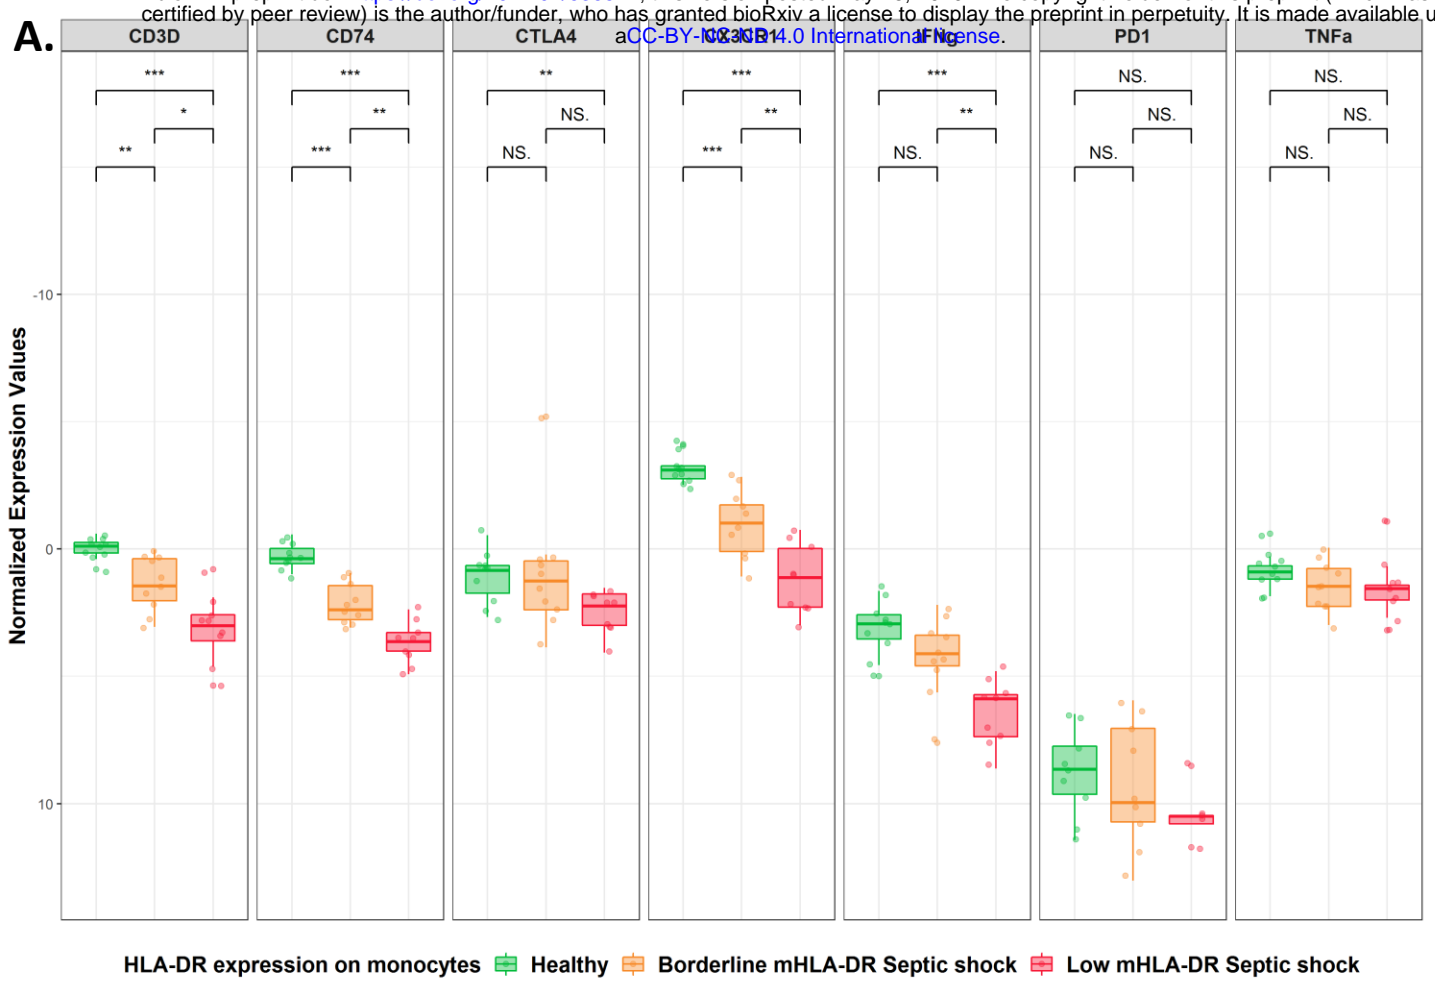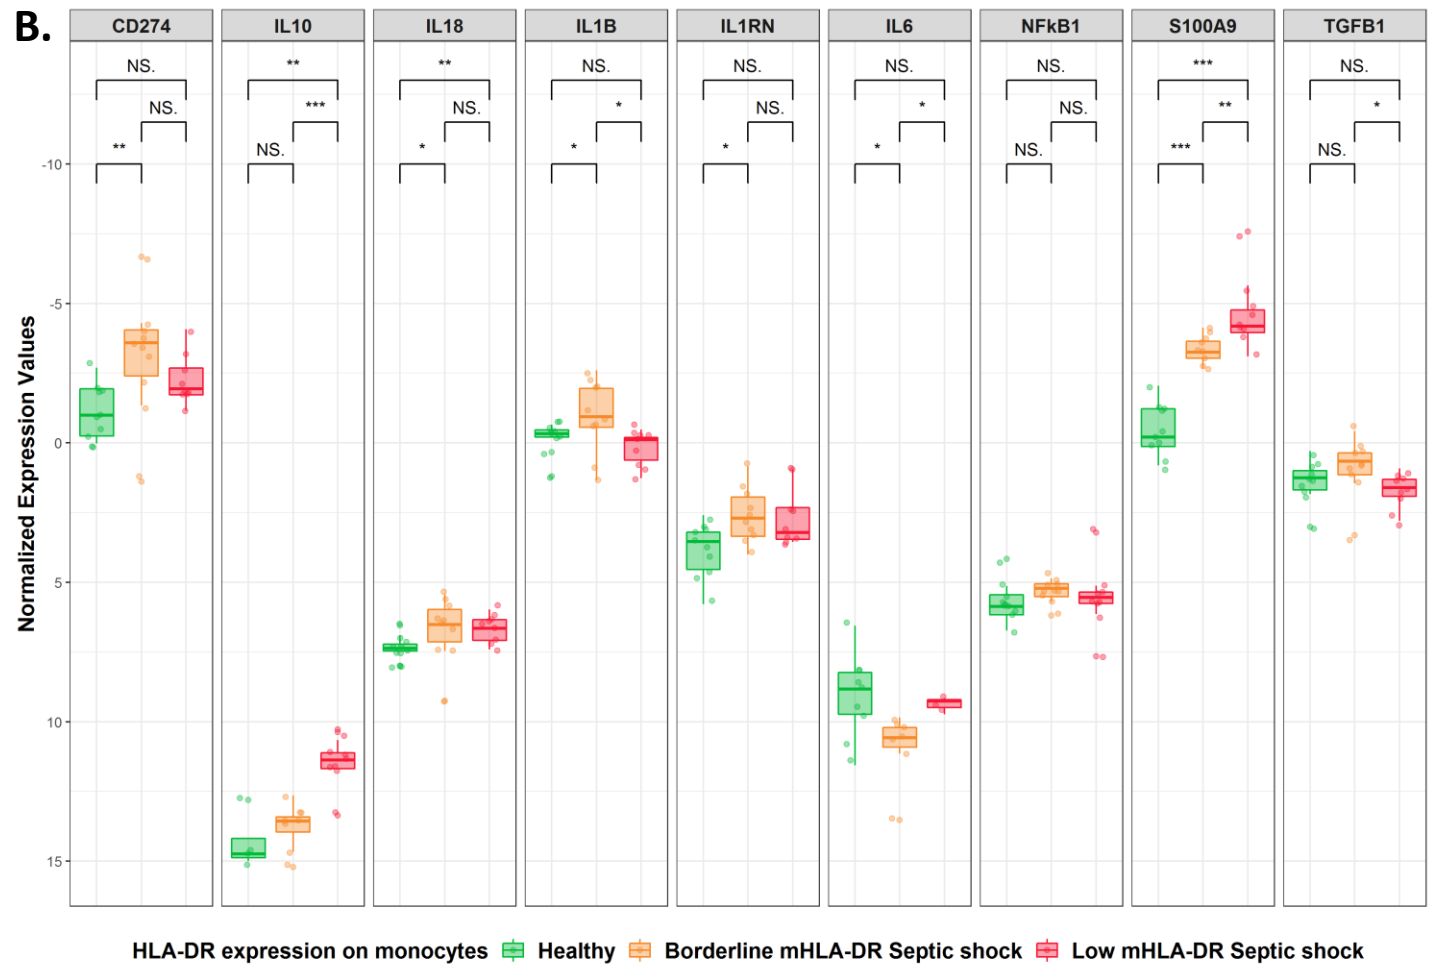

Source: https://www.biorxiv.org/content/biorxiv/early/2019/05/15/636522.full.pdf
